# Supplementary material for: Inflammation-Related MicroRNAs Are Associated with Plaque Stability Calculated by IVUS in Coronary Heart Disease Patients
Source: J Interv Cardiol. 2019 Dec 1;2019:9723129. doi: 10.1155/2019/9723129 (PMC6915018; doi:10.1155/2019/9723129)
Supplement: Supplementary Materials — The results of CAG (CAD, non-CAD) in SAP group, UAP group, AMI group. [file 9723129.f1.xlsx]

## Sheet: Sheet2
	group	coronary angiography
1	CPS	non-CAD
2	CPS	non-CAD
3	CPS	non-CAD
4	CPS	non-CAD
5	CPS	CAD
6	CPS	non-CAD
7	CPS	non-CAD
8	CPS	non-CAD
9	CPS	non-CAD
10	CPS	non-CAD
11	CPS	non-CAD
12	CPS	non-CAD
13	CPS	non-CAD
14	CPS	non-CAD
15	CPS	non-CAD
16	CPS	CAD
17	CPS	non-CAD
18	CPS	non-CAD
19	CPS	non-CAD
20	CPS	non-CAD
21	CPS	non-CAD
22	CPS	non-CAD
23	CPS	non-CAD
24	CPS	non-CAD
25	CPS	non-CAD
26	CPS	non-CAD
27	CPS	non-CAD
28	CPS	non-CAD
29	CPS	non-CAD
30	CPS	non-CAD
31	CPS	non-CAD
32	CPS	non-CAD
33	CPS	non-CAD
34	CPS	non-CAD
35	CPS	non-CAD
36	CPS	non-CAD
37	CPS	non-CAD
38	CPS	non-CAD
39	CPS	non-CAD
40	CPS	non-CAD
41	CPS	non-CAD
42	CPS	non-CAD
43	CPS	non-CAD
44	CPS	non-CAD
45	CPS	non-CAD
46	CPS	non-CAD
47	CPS	non-CAD
48	CPS	non-CAD
49	CPS	non-CAD
50	CPS	CAD
51	CPS	non-CAD
52	CPS	non-CAD
53	CPS	non-CAD
54	CPS	non-CAD
55	CPS	non-CAD
56	CPS	non-CAD
57	CPS	non-CAD
58	CPS	non-CAD
59	CPS	non-CAD
60	CPS	non-CAD
61	CPS	non-CAD
62	CPS	non-CAD
63	CPS	non-CAD
64	CPS	non-CAD
65	CPS	non-CAD
66	CPS	non-CAD
67	CPS	non-CAD
68	CPS	non-CAD
69	CPS	non-CAD
70	CPS	non-CAD
71	CPS	non-CAD
72	CPS	non-CAD
73	CPS	non-CAD
74	CPS	non-CAD
75	CPS	non-CAD
76	CPS	non-CAD
77	CPS	non-CAD
78	CPS	non-CAD
79	CPS	non-CAD
80	CPS	non-CAD
81	CPS	non-CAD
82	CPS	CAD
83	CPS	non-CAD
mean
SD
	group	coronary angiography
1	SAP	non-CAD
2	SAP	CAD
3	SAP	CAD
4	SAP	CAD
5	SAP	non-CAD
6	SAP	CAD
7	SAP	non-CAD
8	SAP	non-CAD
9	SAP	CAD
10	SAP	CAD
11	SAP	CAD
12	SAP	non-CAD
13	SAP	non-CAD
14	SAP	non-CAD
15	SAP	CAD
16	SAP	CAD
17	SAP	CAD
18	SAP	CAD
19	SAP	CAD
20	SAP	CAD
21	SAP	CAD
22	SAP	non-CAD
23	SAP	CAD
24	SAP	CAD
25	SAP	CAD
26	SAP	CAD
27	SAP	CAD
28	SAP	CAD
29	SAP	CAD
30	SAP	CAD
31	SAP	CAD
32	SAP	CAD
33	SAP	CAD
34	SAP	CAD
35	SAP	CAD
36	SAP	CAD
37	SAP	CAD
38	SAP	CAD
39	SAP	CAD
40	SAP	CAD
41	SAP	non-CAD
42	SAP	CAD
43	SAP	CAD
44	SAP	CAD
45	SAP	CAD
46	SAP	CAD
47	SAP	CAD
48	SAP	CAD
49	SAP	CAD
50	SAP	CAD
51	SAP	CAD
52	SAP	non-CAD
53	SAP	non-CAD
54	SAP	CAD
55	SAP	CAD
56	SAP	non-CAD
57	SAP	CAD
58	SAP	CAD
59	SAP	CAD
60	SAP	CAD
61	SAP	non-CAD
62	SAP	non-CAD
63	SAP	CAD
64	SAP	CAD
65	SAP	CAD
66	SAP	CAD
67	SAP	CAD
68	SAP	CAD
69	SAP	CAD
70	SAP	CAD
71	SAP	CAD
72	SAP	non-CAD
73	SAP	non-CAD
74	SAP	CAD
75	SAP	CAD
76	SAP	CAD
77	SAP	CAD
78	SAP	CAD
79	SAP	CAD
80	SAP	CAD
81	SAP	CAD
82	SAP	CAD
83	SAP	non-CAD
84	SAP	non-CAD
85	SAP	CAD
86	SAP	CAD
87	SAP	CAD
88	SAP	CAD
mean
SD
	group	coronary angiography
1	UAP	CAD
2	UAP	CAD
3	UAP	CAD
4	UAP	CAD
5	UAP	CAD
6	UAP	CAD
7	UAP	non-CAD
8	UAP	CAD
9	UAP	CAD
10	UAP	CAD
11	UAP	CAD
12	UAP	CAD
13	UAP	CAD
14	UAP	CAD
15	UAP	non-CAD
16	UAP	non-CAD
17	UAP	non-CAD
18	UAP	CAD
19	UAP	CAD
20	UAP	CAD
21	UAP	CAD
22	UAP	CAD
23	UAP	CAD
24	UAP	non-CAD
25	UAP	CAD
26	UAP	CAD
27	UAP	CAD
28	UAP	CAD
29	UAP	CAD
30	UAP	CAD
31	UAP	CAD
32	UAP	CAD
33	UAP	CAD
34	UAP	CAD
35	UAP	CAD
36	UAP	CAD
37	UAP	CAD
38	UAP	CAD
39	UAP	CAD
40	UAP	CAD
41	UAP	non-CAD
42	UAP	CAD
43	UAP	CAD
44	UAP	CAD
45	UAP	CAD
46	UAP	CAD
47	UAP	non-CAD
48	UAP	CAD
49	UAP	CAD
50	UAP	CAD
51	UAP	CAD
52	UAP	CAD
53	UAP	CAD
54	UAP	CAD
55	UAP	CAD
56	UAP	non-CAD
57	UAP	CAD
58	UAP	CAD
59	UAP	CAD
60	UAP	CAD
61	UAP	CAD
62	UAP	CAD
63	UAP	CAD
64	UAP	CAD
65	UAP	CAD
66	UAP	CAD
67	UAP	CAD
68	UAP	non-CAD
69	UAP	non-CAD
70	UAP	CAD
71	UAP	CAD
72	UAP	CAD
73	UAP	CAD
74	UAP	CAD
75	UAP	CAD
76	UAP	CAD
77	UAP	CAD
78	UAP	CAD
79	UAP	CAD
80	UAP	CAD
81	UAP	CAD
82	UAP	CAD
83	UAP	CAD
84	UAP	CAD
85	UAP	CAD
86	UAP	CAD
87	UAP	CAD
88	UAP	CAD
89	UAP	CAD
90	UAP	CAD
91	UAP	CAD
92	UAP	CAD
93	UAP	CAD
94	UAP	CAD
95	UAP	CAD
96	UAP	CAD
97	UAP	CAD
mean
SD
	group	coronary angiography
1	AMI	CAD
2	AMI	CAD
3	AMI	CAD
4	AMI	CAD
5	AMI	CAD
6	AMI	CAD
7	AMI	CAD
8	AMI	CAD
9	AMI	CAD
10	AMI	CAD
11	AMI	CAD
12	AMI	CAD
13	AMI	CAD
14	AMI	CAD
15	AMI	CAD
16	AMI	CAD
17	AMI	CAD
18	AMI	CAD
19	AMI	CAD
20	AMI	CAD
21	AMI	CAD
22	AMI	CAD
23	AMI	CAD
24	AMI	CAD
25	AMI	CAD
26	AMI	CAD
27	AMI	CAD
28	AMI	CAD
29	AMI	CAD
30	AMI	CAD
31	AMI	CAD
32	AMI	CAD
33	AMI	CAD
34	AMI	CAD
35	AMI	CAD
36	AMI	CAD
37	AMI	CAD
38	AMI	CAD
39	AMI	CAD
40	AMI	CAD
41	AMI	CAD
42	AMI	CAD
mean
SD
